# Supplementary material
Source: publisher figshare collection journal article supplement (https://frontiersin.figshare.com/ndownloader/files/27696741)
Supplement: Supplementary file 1 [file 27696741]

**Table S1** Primer sequences for RT-qPCR

| Gene | Primer sequence |
| --- | --- |
| SIRT1 | F: 5’-TCGCAACTATACCCAGAACATAGACA-3’ |
|  | R: 5’-CTGTTGCAAAGGAACCATGACA-3’ |
| KLF4 | F: 5’-CCAAGCTTATGAGGCAGCCACCTGGCGAGTCT-3’ |
|  | R: 5’-CGGAATTCTTAAAAGTGCCTCTTCATGTGTAAG-3’ |
| MMP2 | F: 5’-CTTCCAAGTCTGGAGCGATGT-3’ |
|  | R: 5’-TACCGTCAAAGGGGTATCCAT-3’ |
| Ghrelin | F: 5’-CCATGCCCTCCCCAGGGACC-3’ |
|  | R: 5-ATCACTTGTCGGCTGGGGCCTC-3’ |
| GAPDH | F: 5’-ATGACATCAAGAAGGTGGTG-3’ |
|  | R: 5’-CATACCAGGAAAATGAGCTTG-3’ |

Note: F, forward; R, reverse; SIRT1, sirtuin 1; KLF4, Kruppel-like factor 4; MMP2, matrix metalloproteinase 2; GAPDH, glyceraldehyde-3-phosphate dehydrogenase; RT-qPCR, reverse transcription-quantitative polymerase chain reaction.
